# Supplementary material
Source: PubMed Central journal article supplement (PMC2955217)
Supplement: supp_kfq256_toxsci-10-0519-File009.pdf [file supp_kfq256_toxsci-10-0519-File009.pdf]

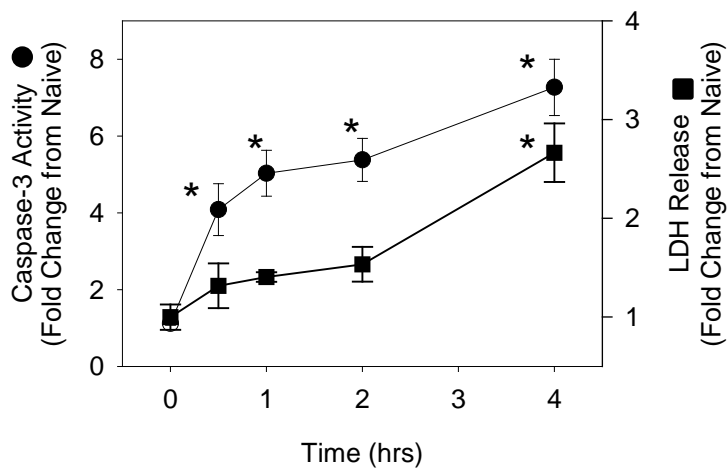

**Supplemental Fig. S1.** GW7845 initiates both apoptosis and necrosis in early B cells. BU-11 cells were treated with Vh (DMSO, 0.1%) or GW7845 (40  $\mu$ M) for 0.5-4 hr. Caspase-3 activity and LDH release were assessed using the Caspase3/7-Glo Assay and the CytoTox-Glo Assay (Promega). Luminescence values in experimental wells were normalized by that measured in untreated cells and are presented as “Fold Change from Naïve.” Data are presented as means  $\pm$  SE from 4 independent experiments. \*Statistically different from Vh-treated ( $p < 0.05$ , ANOVA, Tukey-Kramer).
